# Supplementary material
Source: Springer Nature journal article supplement (https://springermedizin.de/resource/supplementary/12891_2009_760_MOESM2_ESM.pdf/9506630)

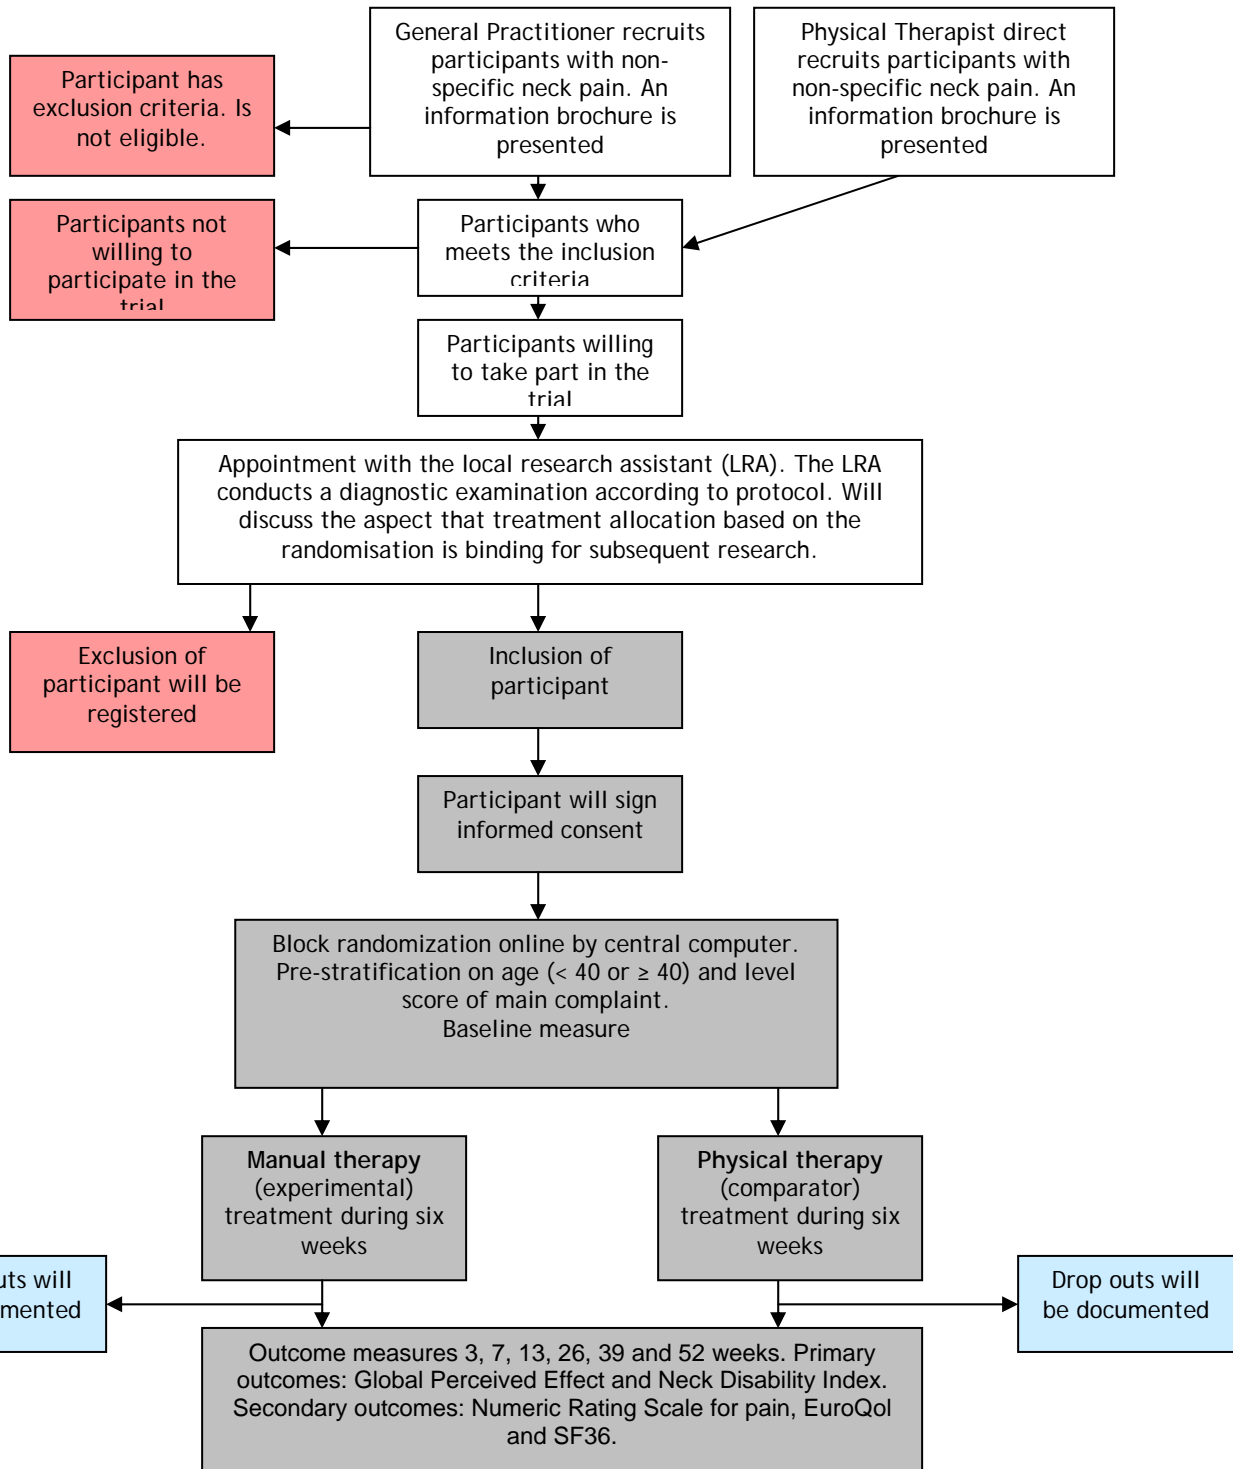

Supplement: MOESM2 [file 9506630]
